1 **Intended for journal:** G3 Genes | Genomes | Genetics – Genome Reports

2

3 **Draft genome of the lowland anoa (*Bubalus depressicornis*) and**  
4 **comparison with buffalo genome assemblies (Bovidae, Bubalina)**

5

6

7 Stefano Porrelli <sup>1</sup>; Michèle Gerbault-Seureau<sup>2</sup>; Roberto Rozzi <sup>3,4</sup>; Rayan Chikhi <sup>5</sup>; Manon

8 Curaudeau <sup>2</sup>; Anne Ropiquet <sup>1</sup>; Alexandre Hassanin <sup>2\*</sup>

9

10

11

12 <sup>1</sup> Middlesex University, Department of Natural Sciences - Faculty of Science and Technology,  
13 The Burroughs, Hendon, London, NW4 4BT.

14 <sup>2</sup> Institut Systématique Evolution Biodiversité (ISYEB), Sorbonne Université, MNHN, CNRS,  
15 EPHE, UA, 57 rue Cuvier, CP 51, 75005 Paris, France.

16 <sup>3</sup> Museum für Naturkunde, Leibniz-Institut für Evolutions- und Biodiversitätsforschung,  
17 10115 Berlin, Germany.

18 <sup>4</sup> German Centre for Integrative Biodiversity Research (iDiv) Halle-Jena-Leipzig, Synthesis  
19 Centre for Biodiversity Sciences (sDiv), Puschstr. 4, D-04103 Leipzig, Germany.

20 <sup>5</sup> Institut Pasteur, Université Paris Cité, Sequence Bioinformatics, 28 rue du Docteur Roux,  
21 75015 Paris, France.

22

23 **\*Corresponding author:** Hassanin, Alexandre – [alexandre.hassanin@mnhn.fr](mailto:alexandre.hassanin@mnhn.fr)

24

25

26 **Keywords:** Bovidae, *Bubalus depressicornis*, lowland anoa, genome assembly, *de novo*  
27 assembly

28

29

30

31

32

33 **Abstract**

34 Genomic data for wild species of the genus *Bubalus* (Asian buffaloes) are still lacking while  
35 several whole genomes are currently available for domestic water buffaloes. To address this,  
36 we sequenced the genome of a wild endangered dwarf buffalo, the lowland anoa (*Bubalus*  
37 *depressicornis*), produced a draft genome assembly, and made comparison to published  
38 buffalo genomes.

39 The lowland anoa genome assembly was 2.56 Gbp long and contained 103,135 contigs, the  
40 longest contig being 337.39 kbp long. N50 and L50 values were 38.73 kbp and 19.83 kbp,  
41 respectively, mean coverage was 44x and GC content was 41.74%. Two strategies were  
42 adopted to evaluate genome completeness: (i) determination of genomic features with *de*  
43 *novo* and homology-based predictions using annotations of chromosome-level genome  
44 assembly of the river buffalo, and (ii) employment of benchmarking against universal single-  
45 copy orthologs (BUSCO). Homology-based predictions identified 94.51% complete and 3.65%  
46 partial genomic features. *De novo* gene predictions identified 32,393 genes, representing  
47 97.14% of the reference's annotated genes, whilst BUSCO search against the mammalian  
48 orthologues database identified 71.1% complete, 11.7% fragmented and 17.2% missing  
49 orthologues, indicating a good level of completeness for downstream analyses. Repeat  
50 analyses indicated that the lowland anoa genome contains 42.12% of repetitive regions. The  
51 genome assembly of the lowland anoa is expected to contribute to comparative genome  
52 analyses among bovid species.

53

54 **1. Introduction**

55 The lowland anoa, *Bubalus depressicornis* (C. H. Smith, 1827), is a wild dwarf buffalo endemic  
56 to Sulawesi and Buton Islands, where it can be found in sympatry with the mountain anoa,  
57 *Bubalus quarlesi* (Ouwens, 1910). Both anoa species are currently classified as endangered  
58 with declining populations due to hunting and habitat loss (Burton et al. 2016). Because of  
59 their singular appearance, they were initially described in their own genus *Anoa* (Ouwens  
60 1910). However, *Anoa* was not regarded as a valid genus in more recent classifications, in  
61 which both anoa species were ascribed to the genus *Bubalus*, together with the wild water  
62 buffalo – *Bubalus arnee* (Kerr, 1792) and the tamaraw - *Bubalus mindorensis* Heude, 1888  
63 (Groves 1969; IUCN 2022). Molecular studies based on mitochondrial sequences have

64 supported a sister-group relationship between *Bubalus depressicornis* and *Bubalus quarlesi*  
65 (Schreiber et al., 1999; Priyono et al., 2020). In addition, the mitogenome of the lowland anoa  
66 was found to be equally distant from those of the two types of domestic water buffalo, the  
67 river buffalo from the Indian subcontinent and Mediterranean countries and the swamp  
68 buffalo from China and Southeast Asia (Hassanin et al., 2012). Since the same phylogenetic  
69 pattern was recovered from the analyses of two nuclear datasets, one based on 30 autosomal  
70 genes and the other based on two genes of the Y chromosome, Curaudeau et al. (2021) have  
71 concluded the existence of two species of domestic buffaloes: *Bubalus bubalis* (Linnaeus,  
72 1758) for the river buffalo and *Bubalus kerabau* Fitzinger, 1860 for the swamp buffalo, which  
73 diverged during the Pleistocene at around 0.84 Mya. As discussed in Curaudeau et al. (2021),  
74 the two domestic species can easily be distinguished based on coat and horn characteristics  
75 (Castelló 2016), and they have different karyotypes: *Bubalis bubalis* has  $2n = 50$  chromosomes  
76 with a fundamental number (FN) equal to 58; whereas *Bubalus kerabau* has  $2n = 48$   
77 chromosomes and FN = 56 (Nguyen et al., 2008).

78

79 With rapid progress and cost reduction in sequencing technologies, many whole genomes of  
80 domestic bovid species have been sequenced. Whole-genome sequencing has allowed the  
81 identification of variants involved in domestication and genetic improvement for several  
82 livestock species such as cattle and buffaloes (Zimin et al., 2009; Canavez et al., 2012; Li et al.,  
83 2020; Rosen et al., 2020). Chromosome-level genome assemblies include those of the  
84 domestic cow, *Bos taurus* (Zimin et al., 2009), the domestic river buffalo, *Bubalus bubalis*  
85 (Deng et al., 2016), the swamp buffalo, *Bubalus kerabau* (reported as *Bubalus carabanensis*  
86 in Luo et al. (2020) but see Curaudeau et al. (2021) for further taxonomic information), the  
87 domestic Yak, *Bos grunniens* (Zhang et al., 2021) and the zebu cattle, *Bos indicus* (Canavez et  
88 al. 2012). Whereas a total of eight chromosome- and scaffold-level genome assemblies are  
89 publicly available for domestic buffaloes, there is currently no genome data available for wild  
90 species of the genus *Bubalus*. To fill this gap, a biopsy of a living lowland anoa was used for  
91 next-generation sequencing, and a draft genome was assembled *de novo* for comparison to  
92 other buffalo genome assemblies available in international databases such as NCBI (National  
93 Center for Biotechnology Information) and BIG\_GWH (Beijing Institute of Genomics Genome  
94 Warehouse database).

95

## 96 **2. Material & Methods**

### 97 **2.1 DNA extraction, library preparation and genome sequencing**

98 A living male adult of lowland anoa, named Yannick, was sampled at the *Ménagerie du Jardin*  
99 *des Plantes* of the Muséum national d'Histoire naturelle (MNHN, Paris, France) (Figure 1). A  
100 skin biopsy was performed in 2006 by a veterinary surgeon following protocols approved by  
101 the MNHN and in line with ethical guidelines. The same biopsy was previously used to  
102 determine its karyotype (2n = 48; FN = 58; Nguyen et al., 2008). DNA was extracted using the  
103 DNeasy Blood and Tissue Kit (Qiagen, Hilden, Germany) following the manufacturer's protocol.  
104 DNA quantification was performed with a Qubit® 2.0 Fluorometer with Qubit dsDNA HS Assay  
105 Kit (Thermo Fischer Scientific, Waltham, MA, USA). Library preparation and sequencing were  
106 conducted at the *Institut du Cerveau et de la Moelle épinière*. The sample was sequenced on  
107 a NextSeq® 500 Illumina system generating 2 X 151 bp reads using the NextSeq 500 High  
108 Output Kit v2 with 300 cycles and aiming for an insert size of 350 bp.

109

### 110 **2.2 De novo assembly**

111 Data quality was assessed with FastQC v.0.11.5 ([https://www.bioinformatics.babraham](https://www.bioinformatics.babraham.ac.uk/projects/fastqc/)  
112 [am.ac.uk/projects/fastqc/](https://www.bioinformatics.babraham.ac.uk/projects/fastqc/)) and results were collated with MultiQC v1.12 (Ewels et al., 2016).  
113 Raw reads were quality trimmed and adapter sequences and contaminants removed with  
114 Trimmomatic v.0.36 (Bolger et al., 2014) with the following parameters: "ILLUMINACLIP:  
115 TruSeq3 -PE.fa:2:30:10 LEADING:33 TRAILING:3 SLIDINGWINDOW:4:15 MINLEN:36". Data  
116 quality of quality-trimmed reads was re-assessed with FastQC. A *de novo* assembly was  
117 performed with MaSuRCA v.3.3.1 (Zimin et al., 2013; Zimin et al., 2017) using recommended  
118 parameters for mammalian genomes and paired-end Illumina-only data, as indicated in Zimin  
119 et al. (2017). Mean and standard deviation for the Insert size were estimated with an  
120 "estimate-insert-size" script (<https://gist.github.com/rchikhi/7281991>). Paired-end reads  
121 were error corrected using Quorum (Marçais et al., 2015) and assembled into super-reads  
122 using a k-mer size of 99, as selected by the MaSuRCA assembler. The super-reads were then  
123 assembled into contigs using the CABOG assembler, part of the MaSuRCA pipeline (Zimin et  
124 al., 2017), followed by gap closing with the paired-end information (Zimin et al., 2013).

125

### 126 **2.3 Assembly quality assessment**

127 Genome assemblies publicly available for *Bubalus* and *Syncerus* genera were retrieved from  
128 NCBI and BIG\_GWH for quality comparison and assessment. The dataset included two  
129 assemblies at the chromosome level for the river buffalo (*Bubalus bubalis*) with a coverage of  
130 100x and 572x, four scaffold-level draft assemblies of river buffalo with coverage ranging  
131 between 69x and 119x, one chromosome-level assembly of swamp buffalo (*Bubalus kerabau*)  
132 with a mean coverage of 65x, and one scaffold-level draft assembly of the African buffalo  
133 (*Syncerus caffer*) with 162x coverage. The eight retrieved assemblies were sequenced and  
134 assembled with different methods, summarised in Table 1.

135 The quality of the lowland anoa genome assembly was assessed with QAST-LG v.5.0.1  
136 (Mikheenko et al., 2018) using the river buffalo NDDB\_SH\_1 genome assembly (Deng et al.,  
137 2016) as a reference. The default parameters for mammalian genomes were used to compare  
138 all assemblies in QAST-LG: “MODE: large, threads: 50, eukaryotic: true, minimum contig  
139 length: 3,000, minimum alignment length: 500, ambiguity: one, threshold for extensive  
140 misassembly size: 7,000”. All analysed assemblies were aligned to the river buffalo  
141 NDDB\_SH\_1 assembly and results were plotted with Circos v. 0.69.8 (Krzywinski et al., 2009)  
142 and Jupiter consistency plots (Chu, 2018).

143 We adopted two different strategies to evaluate genome completeness. Firstly, genomic  
144 features were predicted with the homology-based method by aligning the lowland anoa  
145 genome to that of the annotated river buffalo reference genome (NDDB\_SH\_1 and relative  
146 annotations retrieved from NCBI). Secondly, we used a *de novo* gene prediction method with  
147 GlimmerHMM v3.0.4 (Majoros et al. 2004). Thirdly, we employed benchmarking against  
148 universal single-copy orthologs (BUSCO v5.2.2; Manni et al. 2021) using the mammalia\_odb10  
149 dataset (19/02/2021, number of genomes: 24, number of BUSCOs: 9226) from OrthoDB  
150 (Kriventseva et al. 2019) and compared to other buffalo genome assemblies already  
151 deposited on NCBI and BIG\_GWH (Table 1).

152

#### 153 2.4 Repeats and gene annotation

154 Repetitive regions in the lowland anoa genome were identified, annotated and masked with  
155 RepeatMasker v.4.1.2-p1 (Tarailo-Graovac and Chen, 2009). Firstly, a *de novo* repeat library  
156 was constructed from the genome assembly with RepeatModeler v.2.0.2a. RepeatMasker  
157 was used with default parameters to produce a homolog-based repeat library and mask the  
158 genome’s repetitive regions. The scripts “*calcDivergenceFromAlign.pl*” and

159 “*createRepeatLandscape.pl*” were used to calculate the Kimura divergence values and to plot  
160 the resulting repeat landscape. The repeat landscape of *Bos taurus* was retrieved from the  
161 RepeatMasker database for visual comparison.

162

### 163 **3. Results & Discussion**

#### 164 **3.1 Whole-genome sequencing and data QC**

165 Whole-genome sequencing generated 991,437,058 paired-end reads with a length of 151 bp.  
166 Quality trimming removed 46,616,722 low quality, adapter-contaminated and PCR-  
167 duplicated reads, representing approximately 0.5% of the total reads. A total of 944,820,336  
168 clean paired-end reads were generated, covering the lowland anoa genome with an  
169 estimated 56x depth based on a genome size of 2.56 Gbp. Estimation of insert size using in-  
170 house script returned a mean of 377 and a standard deviation of 83.

171

#### 172 **3.2 De novo assembly quality metrics**

173 The final lowland anoa genome assembly generated here contained 103,135 contigs, the  
174 largest being 337.39 kbp long, an N50 of 38.73 kbp and an L50 of 19.83 kbp (Table 2). Total  
175 length was 2.56 Gbp with a mean coverage of 44x, and GC content was 41.74%, in agreement  
176 with other published assemblies (between 41.60% and 41.92%, Table 3). When aligned to the  
177 NDDDB\_SH\_1 genome assembly, the fraction of the anoa genome assembly was 95.41%, a  
178 value comparable to other buffalo genome assemblies (Figure 2), with a total alignment  
179 length of 2,515,453,843 bp. A total of 886 contigs could not be aligned to the river buffalo  
180 genome assembly, whilst 8,085 contigs were only partially aligned, resulting in a total  
181 unaligned length of 45,224,171 bp, which reflects the discrepancy between the total length  
182 of the lowland anoa genome and the total aligned length to the reference river buffalo  
183 genome assembly. Partially aligned and unaligned contigs could have resulted from structural  
184 variations between the lowland anoa and the reference river buffalo assembly, such as large  
185 INDELS (insertion/deletions), as well as repetitive regions and/or alternative haplotypes  
186 causing assembly errors. The nature of short-read technology causes difficulties in  
187 characterising genomic regions such as telomeres, centromeres, repetitive and highly  
188 heterochromatic regions (Johnson et al. 2005; Low et al. 2019; Weissensteiner and Suh 2019),  
189 which are notoriously difficult to assemble and could be better resolved with long-read  
190 sequencing.

191 The lowland anoa genome assembly has a modest N50 compared to other buffalo genome  
192 assemblies (Table 3), indicating lower levels of contiguity, which is expected due to the short-  
193 read output of Illumina sequencing technology (read length = 151 bp). Additionally, repeat  
194 analysis revealed that 42.12% of the lowland anoa genome is composed of repetitive regions.  
195 This, coupled with low sequence coverage, sequencing and assembly errors, causes breaks in  
196 the assembly contiguity (Gnerre et al., 2011; Low et al., 2019). This is apparent even in high-  
197 quality chromosome-level genome assemblies that use multiple sequencing libraries and  
198 multiple sequencing technologies, such as the previous human genome assembly GRCh38,  
199 which contained hundreds of gaps (International Human Genome Sequencing Consortium  
200 2004). In addition, the chromosome-level genome assemblies retrieved from NCBI  
201 (NDDB\_SH\_1, UOA\_WB\_1) were sequenced using multiple insert size libraries and  
202 sequencing technologies and were intensively verified with multiple methods such as optical  
203 mapping, Hi-C and RH (Deng et al., 2016; Low et al., 2019).

204 Moreover, quality metrics of publicly available assemblies are usually limited to reporting N50  
205 and L50 values, which represent the shortest contig length needed to cover 50% of the total  
206 assembly size, and the number of contigs whose cumulative length covers 50% of the total  
207 assembly size, respectively (Bradnam et al., 2013). Such metrics are often used to compare  
208 and evaluate performances of the ever-growing assembly and annotation methods and  
209 software (Manchanda et al., 2020). However, we hereby show that reporting N50 and L50  
210 metrics exclusively can be misleading, as they only provide a standard measure of assembly  
211 contiguity whilst omitting information such as gene content and completeness, as well as  
212 assembly correctness. Furthermore, N50 values can be artificially raised by deliberately  
213 excluding short contigs from analyses and by the presence of undetermined nucleotides (Ns)  
214 linking the scaffolded contigs (Gurevich et al. 2013). Therefore, to assess the quality of the  
215 lowland anoa genome assembly, we generated conventional N50 and L50 metrics and also  
216 determined genome completeness in terms of gene content and genome correctness by  
217 comparing our assembly to a chromosome level genome assembly of the river buffalo  
218 (*Bubalus bubalis*). Additionally, a swamp buffalo (*Bubalus kerabau*, CUSA\_SWP) and a more  
219 distantly related African buffalo species (*Syncerus caffer*, ABF221) were also included in our  
220 comparison.

221 Regardless of the modest N50 value, the lowland anoa genome assembly is in good  
222 agreement with the NDDB\_SH\_1 assembly, with 95.91% of contigs correctly mapped to the



223 25 reference chromosomes of the river buffalo and fewer misassembled blocks compared to  
224 other draft assemblies (Figure 3). The genome assembly of the Egyptian river buffalo  
225 (EGYBUF\_1.0) had an abnormally high number of misassembled blocks with respect to the  
226 reference genome, followed by the genome assembly of a female Italian river buffalo  
227 (UOA\_WB\_1). To investigate this, misassemblies and structural variation metrics were  
228 computed in QUAST-LG (Table 4). The Egyptian river buffalo assembly (EGYBUF\_1.0) showed  
229 the highest number of mismatches and the highest number of Ns, followed by the Jaffrabadi  
230 river buffalo (AAUIN\_1). The genome assembly of the African buffalo (*S. caffer*, ABF221)  
231 showed a larger number of mismatches (Table 4), but this can be explained by the higher  
232 sequence divergence between *Syncerus* and *Bubalus*, as the two genera have separated in  
233 the Late Miocene (Hassanin et al., 2012). Misassemblies and structural variation metrics could  
234 not explain the misassembled blocks of the UOA\_WB\_1 assembly observed in the Circos plot  
235 of Figure 3. However, some of these misassembled blocks could be due to unplaced contigs.  
236 To investigate this, the UOA\_WB\_1 assembly was aligned to the NDDB\_SH\_1 reference to  
237 generate Jupiter consistency plots. When using the largest 26 contigs of the UOA\_WB\_1  
238 assembly to cover 100% of the reference river buffalo genome, an almost perfect level of  
239 synteny was observed (Figure 4a). Although this result was expected for genomes of the same  
240 species, it also indicates a good level of assembly quality in terms of correctness. However,  
241 when including all 509 contigs of the UOA\_WB\_1 assembly, several misassembled regions  
242 were observed (Figure 4b). Three non-exclusive hypotheses can be advanced to interpret this  
243 result: possible genomic rearrangements, genome assembly errors, and repetitive regions.  
244 Whether the results of the consistency plots are due to the factors mentioned above or other  
245 factors, such as contamination, remains speculative. Nevertheless, the results of the quality  
246 metric comparison conducted here further indicate the unreliability of using exclusively N50  
247 and L50 metrics when assessing assembly quality. Instead, contiguity metrics should be  
248 supplemented with genome completeness and correctness metrics.

249

### 250 3.3 Genomic features, gene prediction and annotation

251 Homology and *de novo* gene predictions performed on the lowland anoa genome assembly  
252 were in agreement with each other and indicated a good level of genome completeness.  
253 Results were comparable to other published genome assemblies (Tables 5 and 6), and an



254 improvement over the Bangladeshi river buffalo (Bubbub\_1.0), the Egyptian river buffalo  
255 (EGYBUF\_1.0) and Mediterranean river buffalo (UMD\_CASPUR\_WB\_2.0) assemblies.  
256 Interestingly, these three assemblies showed higher contiguity (N50) than the draft assembly  
257 of the lowland anoa, further indicating the unreliability of using exclusively N50 and L50  
258 metrics when assessing genome assembly quality.

259 Out of the 1,921,249 genomic features annotations of the reference assembly NDDB\_SH\_1,  
260 homology prediction identified 1,815,794 (94.51%) complete and 69,929 (3.63%) partial  
261 features in the lowland anoa genome assembly, which is comparable to other published  
262 assemblies (Figure 5), indicating a good level of genome completeness. GlimmerHMM *de*  
263 *novo* predicted 1,027,469 unique genomic features (mRNA and coding sequences, CDS),  
264 which is an improvement over some of the water buffalo assemblies used for quality  
265 comparison (Table 5). Homology-based gene prediction identified 32,393 genes in the  
266 lowland anoa genome assembly, representing 97.14% of the genes annotated in NDDB\_SH\_1  
267 (n= 33,348). Of these, 59.11% (19,148) were complete and 40.88% (13,245) were partial,  
268 probably reflecting the level of fragmentation of the lowland anoa genome assembly.  
269 Nevertheless, the total number of genes predicted still represents an improvement over some  
270 of the compared assemblies (Table 6).

271 When predicting mammalian orthologs with BUSCO, the lowland anoa genome assembly  
272 contained 6,556 (71.1%) complete BUSCOs, of which 6,412 (69.5%) were single-copy and 144  
273 (1.6%) were duplicated. The number of fragmented BUSCOs was 1,076 (11.7%), whilst 1,594  
274 (17.2%) were missing. The BUSCO results indicate an acceptable level of genome  
275 completeness (<70%, Simão et al., 2015) for downstream analyses for the anoa genome  
276 assembly, and a slight improvement over the Egyptian river buffalo assembly (EGYBUF\_1.0,  
277 Figure 6).

278 Mammalian genomes contain large families of repeats (Goodier and Kazazian, 2008), such as  
279 long interspersed nuclear elements (LINEs), short interspersed nuclear elements (SINEs), and  
280 long-terminal repeats (LTRs). RepeatMasker revealed that 42.12% of the lowland anoa  
281 genome is composed of repetitive regions (Table 7), which is comparable to data previously  
282 published for genome assemblies of river buffalo and other bovids (Deng et al., 2016; Low et  
283 al., 2019; Minto et al., 2019; El-Khishin et al., 2020). Results also agree with the repetitive  
284 content in the cattle genome (Figure 7b). Both lowland anoa and cattle genomes showed two  
285 waves of repeat expansion in their repeat landscape (Figure 7a and 7b), suggesting a shared

286 inheritance of such repeats. In the lowland anoa, the LINEs were more abundant,  
287 representing 30.04% of the repeats, followed by LTRs representing 3.10% and SINEs  
288 representing 1.03% (Table 7).

289

#### 290 **4. Conclusion**

291 To date, whole-genome sequencing has allowed identification of variants involved in  
292 domestication and genetic improvement for several livestock species (Zimin et al., 2009;  
293 Canavez et al., 2012; Li et al., 2020; Rosen et al., 2020). However, the lack of wild buffalo  
294 genomes hinders further analyses addressing functional and evolutionary aspects of this  
295 group, as well as possible conservation efforts. The draft genome assembly of the lowland  
296 anoa reported here is expected to contribute to this gap in data availability, as this is the first  
297 draft genome assembly for wild Asian buffaloes. Furthermore, we showed that short-read  
298 Illumina sequencing data can still provide a cost-effective way of sequencing mammalian  
299 genomes to an adequate level of completeness for downstream comparative analyses.

300

#### 301 **Data availability**

302 The genome assembly of the lowland anoa is available on NCBI under accession  
303 XXXXXXXXXXXX. The raw data is available on the Sequence Read Archive (SRA) on NCBI under  
304 accession XXXXXXXXXXXX (under embargo until review).

305

#### 306 **Acknowledgements**

307 We thank the people of the *Ménagerie du Jardin des Plantes* who helped to collect the biopsy  
308 of the lowland anoa used in this study: Norin Chai, Gerard Dousseau, Christelle Hano,  
309 Abderrahmane Latreche, Claire Rejaud, Roland Simon, and Rudy Wedlarski. The authors  
310 would like to thank Huw Jones for the proofreading of the manuscript.

311

#### 312 **Conflict of interest**

313 The authors declare no conflict of interest.

314

#### 315 **Funding**

316 R.R. was supported by sDiv, Synthesis Centre of the German Centre for Integrative  
317 Biodiversity Research (iDiv) Halle-Jena-Leipzig, funded by the German Research Foundation

318 (DFG– FZT 118, 202548816) and by the German Research Foundation (DFG Research grant  
319 RO 5835/2-1).

320

321 **Literature cited:**

322 Bolger AM, Lohse M, Usadel B. 2014. Trimmomatic: A flexible trimmer for Illumina sequence  
323 data. *Bioinformatics*. 30(15):2114–2120. doi:10.1093/bioinformatics/btu170.

324 Bradnam KR, Fass JN, Alexandrov A, Baranay P, Bechner M, Birol I, Boisvert S, Chapman JA,  
325 Chapuis G, Chikhi R, et al. 2013. Assemblathon 2: Evaluating de novo methods of  
326 genome assembly in three vertebrate species. *Gigascience*. 2(1):1–31.  
327 doi:10.1186/2047-217X-2-10.

328 Burton J, Wheeler P, Mustari A. 2016. *Bubalus depressicornis*. IUCN Red List Threat Species  
329 2016. e.T3126A46. doi:10.2305/IUCN.UK.2016-2.RLTS.T3126A46364222.

330 Canavez FC, Luche DD, Stothard P, Leite KRM, Sousa-Canavez JM, Plastow G, Meidanis J,  
331 Souza MA, Feijao P, Moore SS, et al. 2012. Genome sequence and assembly of *Bos*  
332 *indicus*. *J Hered*. 103(3):342–348. doi:10.1093/jhered/esr153.

333 Castelló JR. 2016. *Bovids of the World: Antelopes, Gazelles, Cattle, Goats, Sheep, and*  
334 *Relatives*. Princeton, New Jersey, USA: Princeton University Press.

335 Chu J. 2018. Jupiter plot: a Circos-Based tool to Visualize Genome Assembly Consistency  
336 (Version 1.0). Github. [accessed 2022 Feb 22].  
337 <https://github.com/JustinChu/JupiterPlot>.

338 Curaudeau M, Rozzi R, Hassanin A. 2021. The genome of the lowland anoa (*Bubalus*  
339 *depressicornis*) illuminates the origin of river and swamp buffalo. *Mol Phylogenet*  
340 *Evol*. 161(March):107170. doi:10.1016/j.ympev.2021.107170.  
341 <https://doi.org/10.1016/j.ympev.2021.107170>.

342 Deng T, Pang C, Lu X, Zhu P, Duan A, Tan Z, Huang J, Li H, Chen M, Liang X. 2016. De Novo  
343 transcriptome assembly of the Chinese swamp buffalo by RNA sequencing and SSR  
344 marker discovery. *PLoS One*. 11(1):1–20. doi:10.1371/journal.pone.0147132.

345 El-Khishin DA, Ageez A, Saad ME, Ibrahim A, Shokrof M, Hassan LR, Abouelhoda MI. 2020.  
346 Sequencing and assembly of the Egyptian buffalo genome. *PLoS One*. 15(8  
347 August):1–14. doi:10.1371/journal.pone.0237087.  
348 <http://dx.doi.org/10.1371/journal.pone.0237087>.

349 Ewels P, Magnusson M, Lundin S, Källner M. 2016. MultiQC: Summarize analysis results for

- 350 multiple tools and samples in a single report. *Bioinformatics*. 32(19):3047–3048.  
351 doi:10.1093/bioinformatics/btw354.
- 352 Fitzinger LJ. 1860. Der Sunda-Büffel (*Bubalus kerabau*). In: Wissenschaftlich-populäre  
353 Naturgeschichte der Säugethiere in ihren sämtlichen Hauptformen, V. Kaiserlich-  
354 Königlichen Hof- und Staatsdruckerei. Wien. p. 329.
- 355 Gnerre S, MacCallum I, Przybylski D, Ribeiro FJ, Burton JN, Walker BJ, Sharpe T, Hall G, Shea  
356 TP, Sykes S, et al. 2011. High-quality draft assemblies of mammalian genomes from  
357 massively parallel sequence data. *Proc Natl Acad Sci U S A*. 108(4):1513–1518.  
358 doi:10.1073/pnas.1017351108.
- 359 Goodier JL, Kazazian HH. 2008. Retrotransposons Revisited: The Restraint and Rehabilitation  
360 of Parasites. *Cell*. 135(1):23–35. doi:10.1016/j.cell.2008.09.022.
- 361 Groves CP. 1969. Systematics of the anoa (Mammalia, Bovidae). *Beaufortia*. 17:1–12.
- 362 Gurevich A, Saveliev V, Vyahhi N, Tesler G. 2013. QUASt: Quality assessment tool for  
363 genome assemblies. *Bioinformatics*. 29(8):1072–1075.  
364 doi:10.1093/bioinformatics/btt086.
- 365 Hassanin A, Delsuc F, Ropiquet A, Hammer C, Jansen Van Vuuren B, Matthee C, Ruiz-Garcia  
366 M, Catzeflis F, Areskoug V, Nguyen TT, et al. 2012. Pattern and timing of  
367 diversification of Cetartiodactyla (Mammalia, Laurasiatheria), as revealed by a  
368 comprehensive analysis of mitochondrial genomes. *Comptes Rendus - Biol*.  
369 335(1):32–50. doi:10.1016/j.crv.2011.11.002.
- 370 Heude PM. 1888. Note sur le petit buffle sauvage de l'île de Mindoro (Philippines).  
371 Mémoires Concern l'histoire Nat l'Empire chinois. 2(4):50.
- 372 International Human Genome Sequencing Consortium. 2004. Finishing the euchromatic  
373 sequence of the human genome. *Nature*. 431(7011):931–945.
- 374 IUCN. 2022. *Bubalus depressicornis*. IUCN Red List Threat Species. [accessed 2022 Feb 15].  
375 The IUCN Red List of Threatened Species.
- 376 Johnson JM, Edwards S, Shoemaker D, Schadt EE. 2005. Dark matter in the genome:  
377 Evidence of widespread transcription detected by microarray tiling experiments.  
378 *Trends Genet*. 21(2):93–102. doi:10.1016/j.tig.2004.12.009.
- 379 Kerr R. 1792. Arnee Bos arnee. In: Strahan A, Cadell T, editors. *The Animal Kingdom or*  
380 *zoological system of the celebrated Sir Charles Linnaeus*. Class I. Mammalia.  
381 Edinburgh & London. p. 336.

- 382 Kriventseva E V., Kuznetsov D, Tegenfeldt F, Manni M, Dias R, Simão FA, Zdobnov EM. 2019.  
383 OrthoDB v10: Sampling the diversity of animal, plant, fungal, protist, bacterial and  
384 viral genomes for evolutionary and functional annotations of orthologs. *Nucleic*  
385 *Acids Res.* 47(D1):D807–D811. doi:10.1093/nar/gky1053.
- 386 Krzywinski M, Schein J, Birol I, Connors J, Gascoyne R, Horsman D, Jones SJ, Marra MA. 2009.  
387 *Circos: An information aesthetic for comparative genomics.* *Genome Res.*  
388 19(9):1639–1645. doi:10.1101/gr.092759.109.
- 389 Li X, Yang J, Shen M, Xie XL, Liu GJ, Xu YX, Lv FH, Yang H, Yang YL, Liu C Bin, et al. 2020.  
390 Whole-genome resequencing of wild and domestic sheep identifies genes associated  
391 with morphological and agronomic traits. *Nat Commun.* 11(1):1–16.  
392 doi:10.1038/s41467-020-16485-1.
- 393 Linnaeus. 1758. *Bubalus bubalis*. GBIF Secr. [accessed 2022 Mar 14].  
394 <https://www.gbif.org/species/7422937>.
- 395 Low WY, Tearle R, Bickhart DM, Rosen BD, Kingan SB, Swale T, Thibaud-Nissen F, Murphy  
396 TD, Young R, Lefevre L, et al. 2019. Chromosome-level assembly of the water buffalo  
397 genome surpasses human and goat genomes in sequence contiguity. *Nat Commun.*  
398 10(1):1–11. doi:10.1038/s41467-018-08260-0. [http://dx.doi.org/10.1038/s41467-](http://dx.doi.org/10.1038/s41467-018-08260-0)  
399 [018-08260-0](http://dx.doi.org/10.1038/s41467-018-08260-0).
- 400 Luo X, Zhou Y, Zhang B, Zhang Y, Wang X, Feng T, Li Z, Cui K, Wang Z, Luo C, et al. 2020.  
401 Understanding divergent domestication traits from the whole-genome sequencing of  
402 swamp- and river-buffalo populations. *Natl Sci Rev.* 7(3):686–701.  
403 doi:10.1093/nsr/nwaa024.
- 404 Majoros WH, Pertea M, Salzberg SL. 2004. TigrScan and GlimmerHMM: Two open source ab  
405 initio eukaryotic gene-finders. *Bioinformatics.* 20(16):2878–2879.  
406 doi:10.1093/bioinformatics/bth315.
- 407 Manchanda N, Portwood JL, Woodhouse MR, Seetharam AS, Lawrence-Dill CJ, Andorf CM,  
408 Hufford MB. 2020. GenomeQC: A quality assessment tool for genome assemblies  
409 and gene structure annotations. *BMC Genomics.* 21(1):1–9. doi:10.1186/s12864-  
410 020-6568-2.
- 411 Manni M, Berkeley MR, Seppey M, Simão FA, Zdobnov EM. 2021. BUSCO Update: Novel and  
412 Streamlined Workflows along with Broader and Deeper Phylogenetic Coverage for  
413 Scoring of Eukaryotic, Prokaryotic, and Viral Genomes. *Mol Biol Evol.* 38(10):4647–

- 414 4654. doi:10.1093/molbev/msab199. <https://doi.org/10.1093/molbev/msab199>.
- 415 Marçais G, Yorke JA, Zimin A. 2015. QuorUM: An error corrector for Illumina reads. PLoS  
416 One. 10(6):1–13. doi:10.1371/journal.pone.0130821.
- 417 Mikheenko A, Prjibelski A, Saveliev V, Antipov D, Gurevich A. 2018. Versatile genome  
418 assembly evaluation with QUAST-LG. Bioinformatics. 34(13):i142–i150.  
419 doi:10.1093/bioinformatics/bty266.
- 420 Mintoo AA, Zhang H, Chen C, Moniruzzaman M, Deng T, Anam M, Emdadul Huque QM,  
421 Guang X, Wang P, Zhong Z, et al. 2019. Draft genome of the river water buffalo. Ecol  
422 Evol. 9(6):3378–3388. doi:10.1002/ece3.4965.
- 423 Nguyen TT, Aniskin VM, Gerbault-Seureau M, Planton H, Renard JP, Nguyen BX, Hassanin A,  
424 Volobouev VT. 2008. Phylogenetic position of the saola (*Pseudoryx nghetinhensis*)  
425 inferred from cytogenetic analysis of eleven species of Bovidae. Cytogenet Genome  
426 Res. 122(1):41–54. doi:10.1159/000151315.
- 427 Ouwens PA. 1910. Contribution a la connaissance des mammifères de Célèbeès. Bull Dépt  
428 Agric indes Néerl. 38(Zool., 6):1–7.
- 429 Priyono DS, Solihin DD, Farajallah A, Purwantara B. 2020. The first complete mitochondrial  
430 genome sequence of the endangered mountain anoa (*Bubalus quarlesi*)  
431 (*Artiodactyla*: Bovidae) and phylogenetic analysis. J Asia-Pacific Biodivers. 13(2):123–  
432 133. doi:10.1016/j.japb.2020.01.006. <https://doi.org/10.1016/j.japb.2020.01.006>.
- 433 Rosen BD, Bickhart DM, Schnabel RD, Koren S, Elsik CG, Tseng E, Rowan TN, Low WY, Zimin  
434 A, Couldrey C, et al. 2020. De novo assembly of the cattle reference genome with  
435 single-molecule sequencing. Gigascience. 9(3):1–9. doi:10.1093/gigascience/giaa021.
- 436 Schreiber A, Seibold I, Nötzold G, Wink M. 1999. Cytochrome b gene haplotypes  
437 characterize chromosomal lineages of anoa, the Sulawesi dwarf buffalo (Bovidae:  
438 *Bubalus* sp.). J Hered. 90(1):165–176. doi:10.1093/jhered/90.1.165.
- 439 Simão FA, Waterhouse RM, Ioannidis P, Kriventseva E V, Zdobnov EM. 2015. BUSCO:  
440 assessing genome assembly and annotation completeness with single-copy  
441 orthologs. Bioinformatics. 31(19):3210–3212. doi:10.1093/bioinformatics/btv351.  
442 <https://doi.org/10.1093/bioinformatics/btv351>.
- 443 Smith CH. 1827. The seventh order of the Mammalia. The Ruminantia. In: Griffith E, Smith  
444 CH, Pidgeon E, editors. The animal kingdom arranged in conformity with its  
445 organization, by the Baron Cuvier, member of the Institute of France, with additional

- 446 descriptions of all the species hitherto named, and of many not before noticed.  
447 Whittaker G.B., London. p. 293.
- 448 Tarailo-Graovac M, Chen N. 2009. Using RepeatMasker to identify repetitive elements in  
449 genomic sequences. *Curr Protoc Bioinforma.*(SUPPL. 25):1–14.  
450 doi:10.1002/0471250953.bi0410s25.
- 451 Weissensteiner MH, Suh A. 2019. Repetitive DNA: The Dark Matter of Avian Genomics. In:  
452 Kraus, R. (eds) *Avian genomics in ecology and evolution*. Springer, Cham.  
453 [https://doi.org/10.1007/978-3-030-16477-5\\_5](https://doi.org/10.1007/978-3-030-16477-5_5).
- 454 Zhang S, Liu W, Liu X, Du X, Zhang K, Zhang Y, Song Y, Zi Y, Qiu Q, Lenstra JA, et al. 2021.  
455 Structural Variants Selected during Yak Domestication Inferred from Long-Read  
456 Whole-Genome Sequencing. *Mol Biol Evol.* 38(9):3676–3680.  
457 doi:10.1093/molbev/msab134.
- 458 Zimin A V., Delcher AL, Florea L, Kelley DR, Schatz MC, Puiu D, Hanrahan F, Pertea G, Van  
459 Tassell CP, Sonstegard TS, et al. 2009. A whole-genome assembly of the domestic  
460 cow, *Bos taurus*. *Genome Biol.* 10(4). doi:10.1186/gb-2009-10-4-r42.
- 461 Zimin A V., Marçais G, Puiu D, Roberts M, Salzberg SL, Yorke JA. 2013. The MaSuRCA  
462 genome assembler. *Bioinformatics.* 29(21):2669–2677.  
463 doi:10.1093/bioinformatics/btt476.
- 464 Zimin A V., Puiu D, Luo MC, Zhu T, Koren S, Marçais G, Yorke JA, Dvořák J, Salzberg SL. 2017.  
465 Hybrid assembly of the large and highly repetitive genome of *Aegilops tauschii*, a  
466 progenitor of bread wheat, with the MaSuRCA mega-reads algorithm. *Genome Res.*  
467 27(5):787–792. doi:10.1101/gr.213405.116.

468  
469  
470  
471  
472  
473  
474  
475  
476  
477

**Tables and figures:**



478 **Table 1:** Information regarding genome assemblies available for buffalo species.

| Species / Assembly name                             | Breed           | Geographic location | ID                | Assembly accession no | Sequencing technology                      | Assembly method                                    | Coverage | Assembly level |
|-----------------------------------------------------|-----------------|---------------------|-------------------|-----------------------|--------------------------------------------|----------------------------------------------------|----------|----------------|
| <i>Bubalus bubalis</i><br>NDDB_SH_1_(RefSeq)        | Murrah          | India               | NDDB_SH_1         | GCF_019923935.1       | PacBio Sequel; 10X and BioNano Optical Map | Falcon+Scaff10X+B ioNano v. 2019-02-25             | 572x     | Chromosome     |
| <i>Bubalus bubalis</i><br>Jaffrabadi_v3.0           | Jaffrabadi      | India               | AAUIN_1           | GCA_000180995.3       | 454; Illumina NextSeq 500                  | MaSuRCA v. 2.3.2b                                  | 100x     | Scaffold       |
| <i>Bubalus bubalis</i><br>UOA_WB_1                  | Mediterranean   | Italy               | UOA_WB_1          | GCA_003121395.1       | PacBio                                     | Falcon-Unzip v. 1.8.7                              | 69x      | Chromosome     |
| <i>Bubalus bubalis</i><br>Bubbub1.0                 | Bangladesh      | Bangladesh          | Bubbub1.0         | GCA_004794615.1       | Illumina HiSeq 2000                        | Soapdenovo v. 2.04                                 | 119x     | Scaffold       |
| <i>Bubalus bubalis</i><br>ASM299383v1               | Egyptian        | Egypt               | EGYBUF_1.0        | GCA_002993835.1       | SOLID                                      | Velvet v. 1.1.1; Bowtie2 v. 2.1.0; SHRIMP v. 2.2.3 | 70x      | Scaffold       |
| <i>Bubalus bubalis</i><br>UMD_CASPUR_WB_2.0         | Mediterranean   | USA                 | UMD_CASPUR_WB_2.0 | GCA_000471725.1       | Illumina GAIIx; Illumina HiSeq; 454        | MaSuRCA v. 1.8.3                                   | 70x      | Scaffold       |
| <i>Bubalus depressicornis</i> *<br>MNHNYannick_LA_1 | -               | Indonesia           | MNHNYannick_LA_1  | Assembled<br>MaSuRCA  | Illumina NextSeq 500                       | MaSuRCA v. 3.3.1                                   | 44x      | Scaffold       |
| <i>Bubalus kerabau</i><br>CUSA_SWP                  | Fuzhong         | China               | CUSA_SWP          | GWHAJZ0000000<br>0    | PacBio 57.8                                | Wtdbg 1.2.8                                        | 65x      | Chromosome     |
| <i>Syncerus caffer</i><br>ASM640878v2               | African Buffalo | South Africa        | ABF221            | GCA_006408785.2       | Illumina HiSeq                             | Platanus v. 1.2.4                                  | 162x     | Scaffold       |

479 \*= this study

480

481

**Table 2:** Draft assembly statistics of the lowland anoa genome

| Contig statistics | value         |
|-------------------|---------------|
| Total length      | 2,565,510,706 |
| Number of contigs | 103,135       |
| Largest contig    | 337,395       |
| GC (%)            | 41.74         |
| N50               | 38,737        |
| L50               | 19,832        |

482

483

484

485

486

487

488

489

490

491

492 **Table 3:** Comparison of assembly quality metrics of the lowland anoa (*Bubalus*

493 *depressicornis*) and other buffalo assemblies.

| Name/assembly name (NCBI)                         | ID                | Genome fraction % | Total aligned length | Largest alignment | Scaffolds count | N50         | L50    | GC%   |
|---------------------------------------------------|-------------------|-------------------|----------------------|-------------------|-----------------|-------------|--------|-------|
| <i>Bubalus bubalis</i><br>NDDB_SH1 (RefSeq)       | NDDB_SH_1         | -                 | -                    | -                 | 26              | 116,997,125 | 9      | 41.75 |
| <i>Bubalus bubalis</i><br>Jaffrabadi_v3.0         | AAUIN_1           | 83.189            | 2,299,810,356        | 834,863           | 75,621          | 104,127     | 9,942  | 41.78 |
| <i>Bubalus bubalis</i><br>UOA_WB_1                | UOA_WB_1          | 98.851            | 2,605,694,501        | 34,949,624        | 509             | 117,219,835 | 9      | 41.81 |
| <i>Bubalus bubalis</i><br>Bubbub1.0               | Bubbub1.0         | 86.537            | 2,309,804,413        | 9,328,338         | 14,905          | 7,025,746   | 116    | 41.6  |
| <i>Bubalus bubalis</i><br>ASM299383v1             | EGYBUF_1.0        | 36.01             | 974,053,149          | 2,013,276         | 6,313           | 3,666,815   | 234    | 41.92 |
| <i>Bubalus bubalis</i><br>UMD_CASPUR_WB_2.0       | UMD_CASPUR_WB_2.0 | 93.634            | 2,473,056,510        | 7,952,377         | 5,714           | 1,545,294   | 508    | 41.73 |
| <i>Bubalus depressicornis</i><br>MNHNYannick_LA_1 | MNHNYannick_LA_1  | 95.415            | 2,515,453,834        | 337,395           | 103,135         | 38,737      | 19,832 | 41.74 |
| <i>Bubalus kerabau</i><br>CUSA_SWP                | CUSA_SWP          | 97.086            | 2,557,653,758        | 23,566,932        | 1,534           | 117,253,548 | 8      | 41.83 |
| <i>Syncerus caffer</i><br>ASM640878v2             | ABF221            | 73.046            | 1,942,672,810        | 4,692,267         | 13,167          | 2,448,414   | 351    | 41.72 |

494

495

496

**Table 4:** QUAST-LG statistics of all buffalo assemblies with respect to the river buffalo

497

NDDB\_SH\_1 reference.

|                             | <i>B. depressicornis</i><br>MNHNYannick_LA_1 | <i>B. bubalis</i><br>AAUIN_1 | <i>B. bubalis</i><br>Bubbub1.0 | <i>B. bubalis</i><br>EGYBUF_1.0 | <i>B. bubalis</i><br>UMD_CASPUR_WB_2.0 | <i>B. bubalis</i><br>UOA_WB_1 | <i>B. kerabau</i><br>CUSA_SWP | <i>S. caffer</i><br>ABF221 |
|-----------------------------|----------------------------------------------|------------------------------|--------------------------------|---------------------------------|----------------------------------------|-------------------------------|-------------------------------|----------------------------|
| Misassemblies               | 4,949                                        | 19,238                       | 3,561                          | 131                             | 4,040                                  | 1,724                         | 2,111                         | 6,565                      |
| Relocations                 | 1,447                                        | 13,540                       | 2,761                          | 85                              | 1,434                                  | 1,051                         | 1,199                         | 3,397                      |
| Translocations              | 3,203                                        | 4,714                        | 757                            | 10                              | 2,569                                  | 647                           | 896                           | 3,032                      |
| Inversions                  | 299                                          | 984                          | 43                             | 36                              | 37                                     | 26                            | 16                            | 136                        |
| Misassembled contigs        | 4,550                                        | 15,988                       | 1,049                          | 45                              | 1,943                                  | 255                           | 533                           | 1,727                      |
| Misassembled contigs length | 159,179,266                                  | 1,334,096,556                | 2,506,642,146                  | 55,459,162                      | 1,891,377,139                          | 2,639,940,877                 | 2,594,120,526                 | 2,486,555,687              |
| Local misassemblies         | 7,014                                        | 73,267                       | 241,261                        | 6,933                           | 7,100                                  | 4,870                         | 9,940                         | 435,454                    |
| Possible TEs                | 164                                          | 874                          | 886                            | 10                              | 544                                    | 136                           | 158                           | 654                        |
| Unaligned mis. contigs      | 287                                          | 2,378                        | 548                            | 2,522                           | 63                                     | 104                           | 381                           | 1,324                      |
| Unaligned contigs           | 886 + 8,085<br>partial                       | 2,555 + 57,865<br>partial    | 297 + 7,280<br>partial         | 2,806 + 3,472<br>partial        | 182 + 3,290<br>partial                 | 1 + 416<br>partial            | 140 + 1110<br>partial         | 900 + 7,314<br>partial     |
| Unaligned length            | 45,224,171                                   | 596,227,806                  | 299,544,303                    | 1,673,093,194                   | 82,826,374                             | 49,291,638                    | 51,316,520                    | 779,611,955                |
| Genome fraction (%)         | 95.415                                       | 83.189                       | 86.537                         | 36.01                           | 93.634                                 | 98.851                        | 97.086                        | 73.046                     |
| Duplication ratio           | 1.007                                        | 1.425                        | 1.076                          | 1.36                            | 1.034                                  | 1.005                         | 1.013                         | 1.045                      |
| Mismatches                  | 16,233,421                                   | 19,654,061                   | 23,375,163                     | 17,890,296                      | 10,863,130                             | 10,118,782                    | 15,844,866                    | 114,608,168                |
| Indels                      | 1,578,224                                    | 746,243                      | 705,955                        | 6,440,610                       | 1,136,878                              | 1,400,310                     | 1,534,735                     | 2,128,964                  |
| Indels length               | 12,654,316                                   | 56,163,406                   | 24,209,936                     | 35,356,432                      | 24,745,254                             | 23,411,739                    | 33,123,824                    | 18,236,722                 |
| Mismatches per 100 kbp      | 649                                          | 901                          | 1,030                          | 1,895                           | 442                                    | 390                           | 622                           | 5,983                      |
| Indels per 100 kbp          | 63                                           | 34                           | 31                             | 682                             | 46                                     | 54                            | 60                            | 111                        |
| indels (<= 5 bp)            | 1,297,998                                    | 598,354                      | 515,830                        | 5,758,980                       | 893,802                                | 1,227,309                     | 1,269,689                     | 1,641,754                  |
| indels (> 5 bp)             | 280,226                                      | 147,889                      | 190,125                        | 681,630                         | 243,076                                | 173,001                       | 265,046                       | 487,210                    |
| N's                         | 493,027                                      | 850,098,824                  | 138,209,713                    | 328,128,682                     | 73,946,361                             | 373,500                       | 22,116,406                    | 59,283,755                 |
| N's per 100 kbp             | 19.22                                        | 22,942                       | 5,040.03                       | 11,097                          | 2,820.18                               | 14.06                         | 840.50                        | 2,131.26                   |

498

499

**Table 5:** Gene features (CDS and mRNA) predicted with GlimmerHMM

| Name/assembly name<br>(NCBI)                      | ID                | predicted<br>gene<br>features<br>(unique) | predicted gene<br>features (>= 0 bp) | predicted gene<br>features (>= 300 bp) | predicted gene<br>features (>= 1500<br>bp) | predicted gene<br>features (>= 3,000 bp) |
|---------------------------------------------------|-------------------|-------------------------------------------|--------------------------------------|----------------------------------------|--------------------------------------------|------------------------------------------|
| <i>Bubalus bubalis</i><br>Jaffrabadi_v3.0         | AAUIN_1           | 1,065,654                                 | 1,087,174 + 1,214 part               | 719,235 + 911 part                     | 129,801 + 19 part                          | 24,579 + 7 part                          |
| <i>Bubalus bubalis</i><br>UOA_WB_1                | UOA_WB_1          | 1,055,791                                 | 1,059,972 + 21 part                  | 762,464 + 17 part                      | 154,594 + 0 part                           | 29,659 + 0 part                          |
| <i>Bubalus bubalis</i><br>Bubbub1.0               | Bubbub1.0         | 948,732                                   | 958,663 + 101 part                   | 655,839 + 73 part                      | 136,045 + 4 part                           | 27,867 + 1 part                          |
| <i>Bubalus bubalis</i><br>ASM299383v1             | EGYBUF_1.0        | 826,048                                   | 826,155 + 69 part                    | 530,835 + 37 part                      | 96,365 + 0 part                            | 16,243 + 0 part                          |
| <i>Bubalus bubalis</i><br>UMD_CASPUR_WB_2.0       | UMD_CASPUR_WB_2.0 | 963,177                                   | 964,473 + 138 part                   | 669,508 + 117 part                     | 134,780 + 5 part                           | 26,448 + 2 part                          |
| <i>Bubalus depressicornis</i><br>MNHNYannick_LA_1 | MNHNYannick_LA_1  | 1,027,469                                 | 1,023,163 + 5,278 part               | 702,282 + 4,582 part                   | 131,966 + 204 part                         | 24,994 + 37 part                         |
| <i>Bubalus kerabau</i><br>CUSA_SWP                | CUSA_SWP          | 1,042,862                                 | 1,046,662 + 87 part                  | 752,170 + 70 part                      | 151,809 + 10 part                          | 29,488 + 6 part                          |
| <i>Syncerus caffer</i><br>ASM640878v2             | ABF221            | 1,061,091                                 | 1,064,542 + 229 part                 | 750,719 + 171 part                     | 150,033 + 10 part                          | 29,460 + 1 part                          |

500

501

**Table 6:** Genes predicted with homology-based prediction method.

| Name/assembly name<br>(NCBI)                      | ID                | Genes  | Partial genes | Total  | % Of reference's<br>annotated genes<br>(n= 33,348) |
|---------------------------------------------------|-------------------|--------|---------------|--------|----------------------------------------------------|
| <i>Bubalus bubalis</i><br>Jaffrabadi_v3.0         | AAUIN_1           | 10,804 | 20,895        | 31,699 | 95.05                                              |
| <i>Bubalus bubalis</i><br>UOA_WB_1                | UOA_WB_1          | 30,810 | 1,955         | 32,765 | 98.25                                              |
| <i>Bubalus bubalis</i><br>Bubbub1.0               | Bubbub1.0         | 11,039 | 20,983        | 32,022 | 96.02                                              |
| <i>Bubalus bubalis</i><br>ASM299383v1             | EGYBUF_1.0        | 1,345  | 23,770        | 25,115 | 75.31                                              |
| <i>Bubalus bubalis</i><br>UMD_CASPUR_WB_2.0       | UMD_CASPUR_WB_2.0 | 18,656 | 13,271        | 31,927 | 95.74                                              |
| <i>Bubalus depressicornis</i><br>MNHNYannick_LA_1 | MNHNYannick_LA_1  | 19,148 | 13,245        | 32,393 | 97.14                                              |
| <i>Bubalus kerabau</i><br>CUSA_SWP                | CUSA_SWP          | 28,349 | 3,419         | 31,768 | 95.26                                              |
| <i>Syncerus caffer</i><br>ASM640878v2             | ABF221            | 8,763  | 21,575        | 30,338 | 90.97                                              |

502

503

504

505

506

507

508

509

**Table 7:** Repeat sequence composition of the lowland anoa genome.

| Family         | Copy number of elements | Length occupied (bp) | % Genome |
|----------------|-------------------------|----------------------|----------|
| SINEs          | 296,064                 | 26,945,915           | 1.03%    |
| LINES          | 2,864,468               | 786,815,034          | 30.04%   |
| LINE1          | 1,203,360               | 282,366,346          | 10.78%   |
| LINE2          | 101,415                 | 13,911,301           | 0.53%    |
| RTE/Bov-B      | 1,461,651               | 481,114,012          | 18.37%   |
| LTR elements   | 362,123                 | 81,208,077           | 3.10%    |
| DNA transposon | 255,003                 | 38,433,935           | 1.47%    |
| Small RNA      | 139,586                 | 14,174,190           | 0.54%    |
| Satellites     | 269                     | 52,169               | 0.00%    |
| Simple repeats | 500,363                 | 20,187,327           | 0.77%    |
| Low complexity | 81,685                  | 3,956,146            | 0.15%    |
| Unclassified   | 611,789                 | 100,086,577          | 3.82%    |
| Total          |                         |                      | 42.12%   |

510

511

512

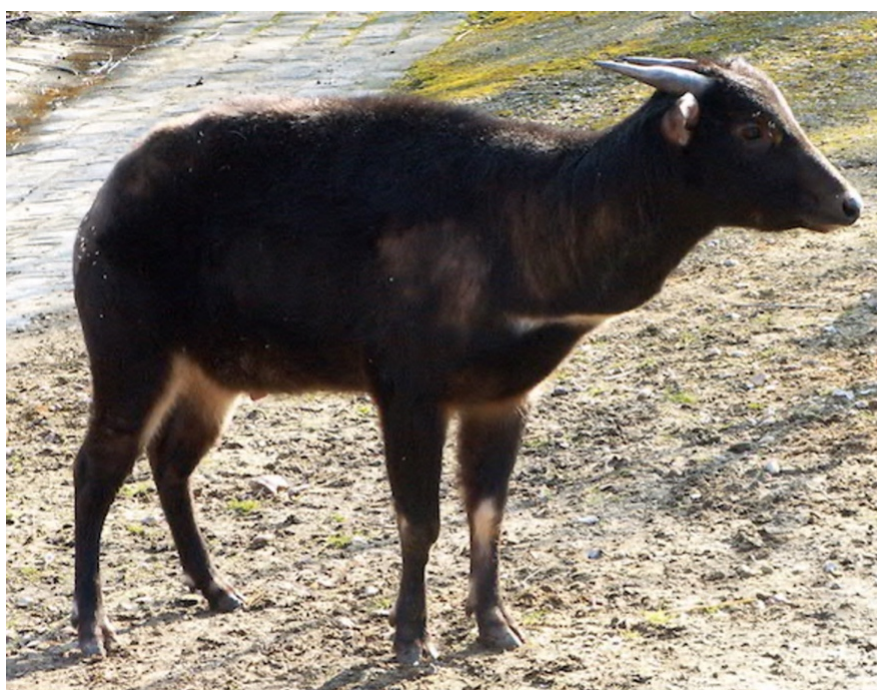

513

514 **Figure 1:** Lowland anoa (*Bubalus depressicornis*) housed at the Ménagerie du Jardin des

515

Plantes (© Alexandre Hassanin - MNHN).

516

517

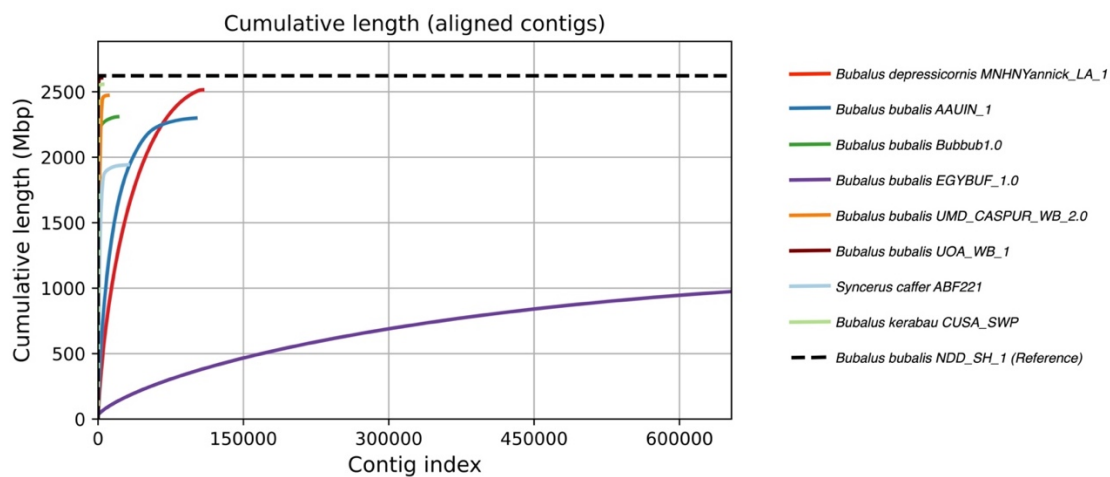

518

519 **Figure 2:** Cumulative length of aligned contigs of the lowland anoa (red line) against the  
 520 river buffalo NDD\_SH\_1 reference genome assembly (dashed line) and compared to other  
 521 buffalo genome assemblies available on NCBI.

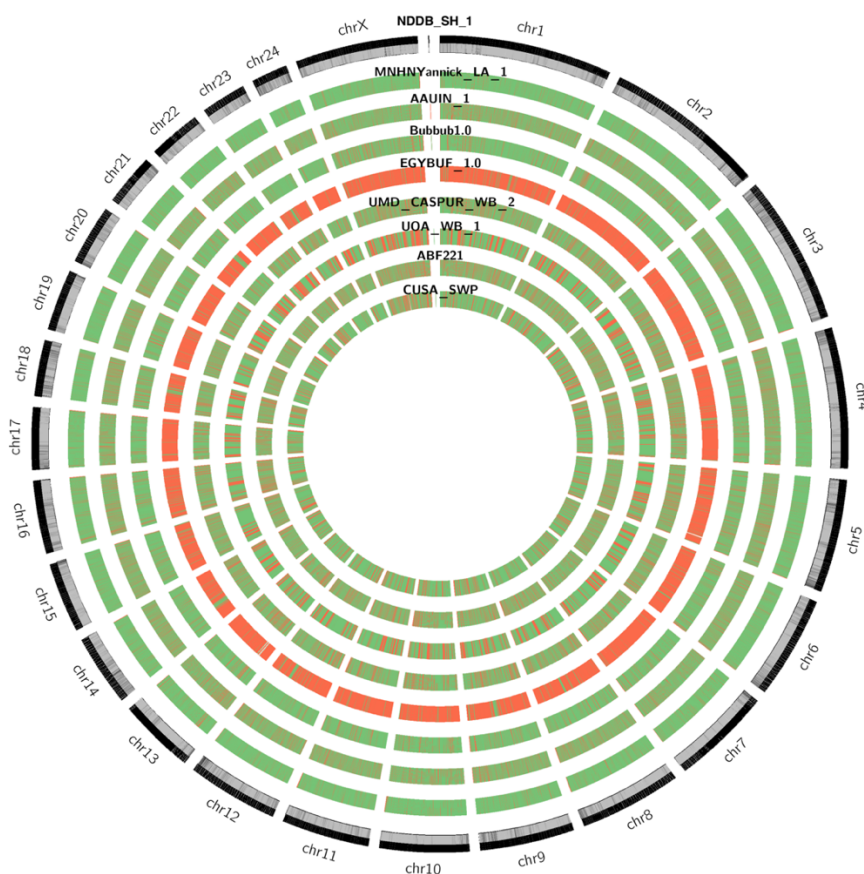

522

523 **Figure 3:** Circos plot of scaffolds mapped to NDD\_SH\_1 reference genome assembly  
 524 (*Bubalus bubalis*). Outer circle represents reference sequence with GC% heatmap (0% =  
 525 white, 69% = black). Inner circles represent assembly tracks, with heatmap representing  
 526 correct contigs (green) and misassembled blocks (red).



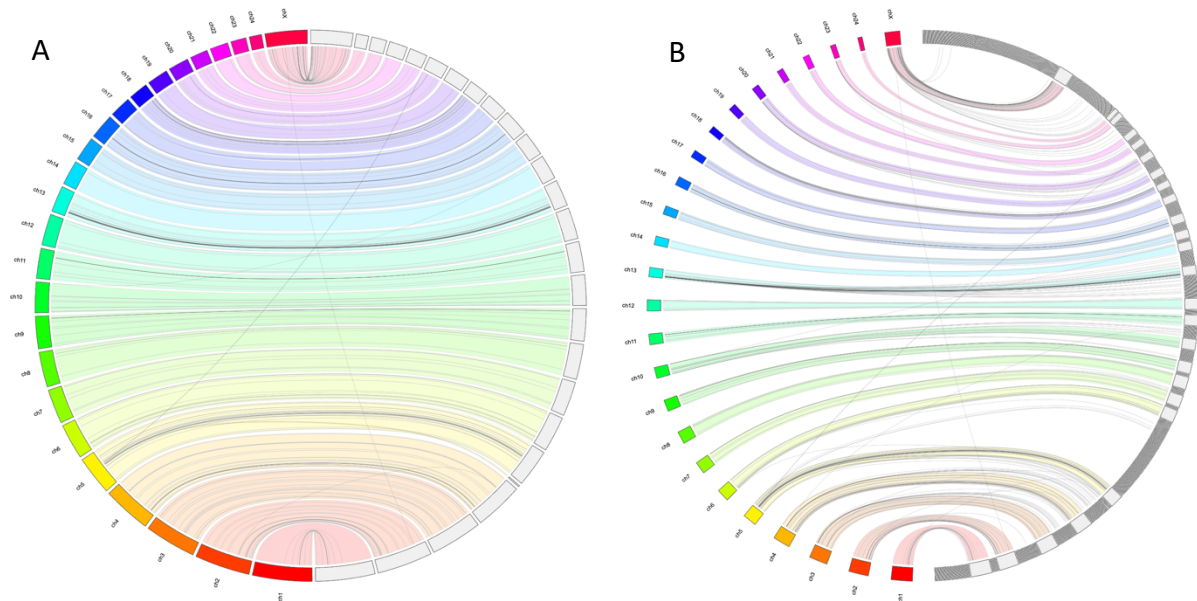

527

528 **Figure 4:** Jupiter consistency plot showing alignment between the river buffalo genome  
 529 assemblies UO\_AWB\_1 and NDDB\_SH\_1. The left of the plots shows the numbered  
 530 NDDB\_SH\_1 chromosomes. The right of the plots shows (A) the 26 longest contigs of the  
 531 UOA\_WB\_1 assembly needed to cover 100% of the reference genome, and (B) all the 509  
 532 contigs of the UO\_AWB\_1 assembly. Coloured bands represent synteny between the  
 533 genomes. Lines represent genomic rearrangements, break points in the scaffolds or  
 534 assembly errors. Absence of lines connecting the UO\_AWB\_1 blocks to the NDDB\_SH\_1  
 535 chromosomes indicates contigs that could not be aligned to the reference.

536

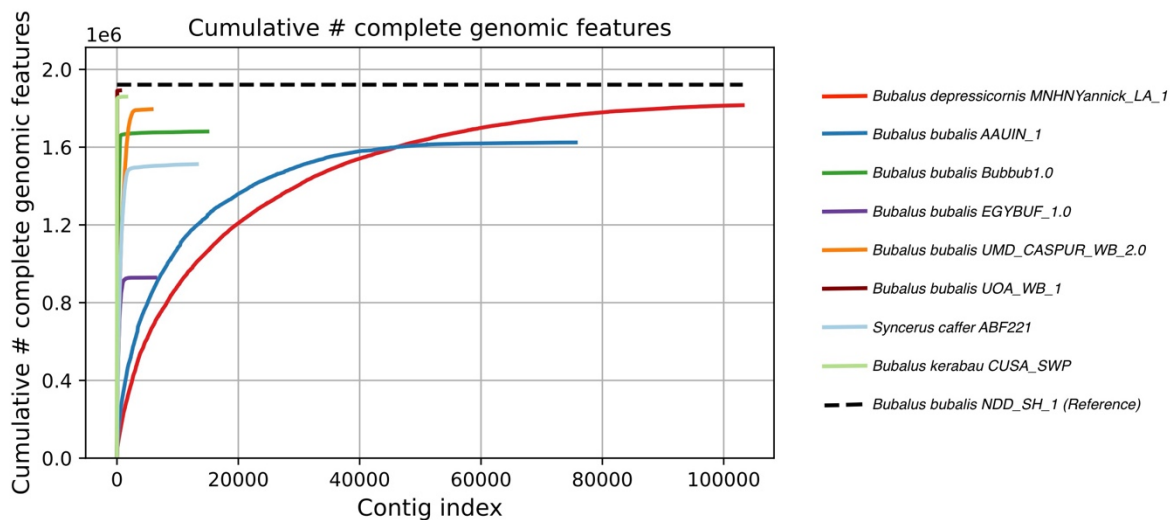

537

538 **Figure 5:** Complete genomic features identified in the lowland anoa assembly and compared  
 539 to other assemblies using the river buffalo (*Bubalus bubalis*) NDD\_SH1 reference sequence  
 540 and annotations.

## BUSCO Assessment Results

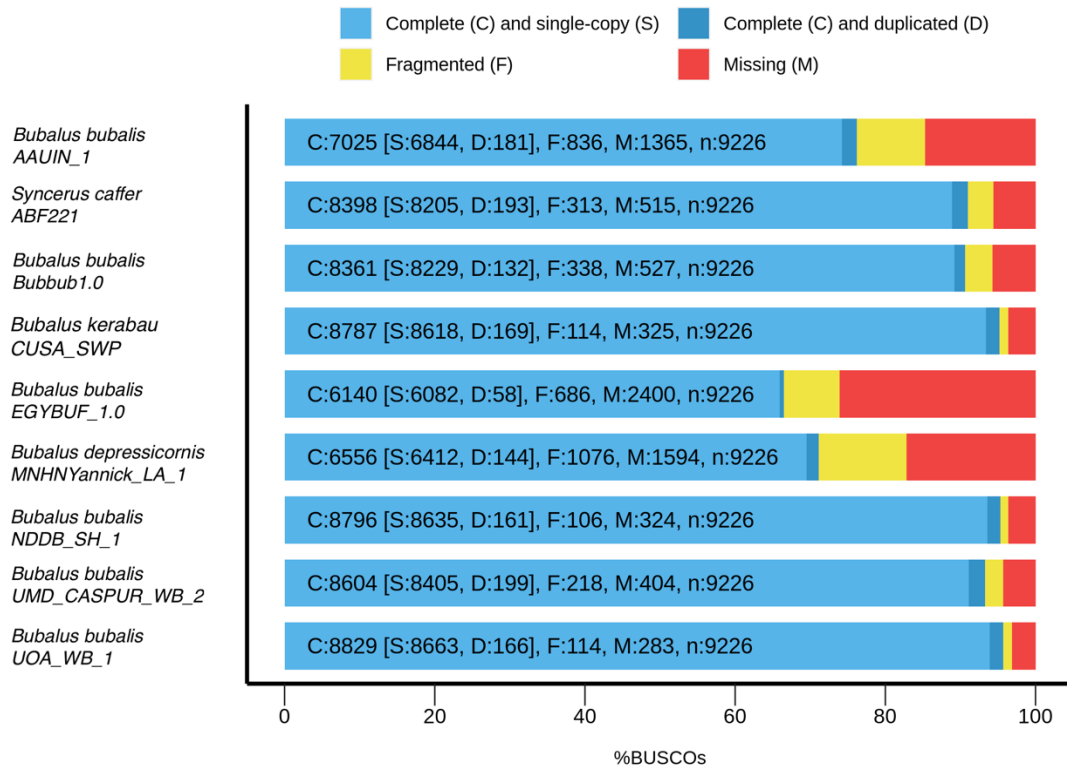

541

542

**Figure 6:** BUSCO results of the genome assembly of the lowland anoa (*Bubalus depressicornis*) compared to other publicly available buffalo genome assemblies.

543

544

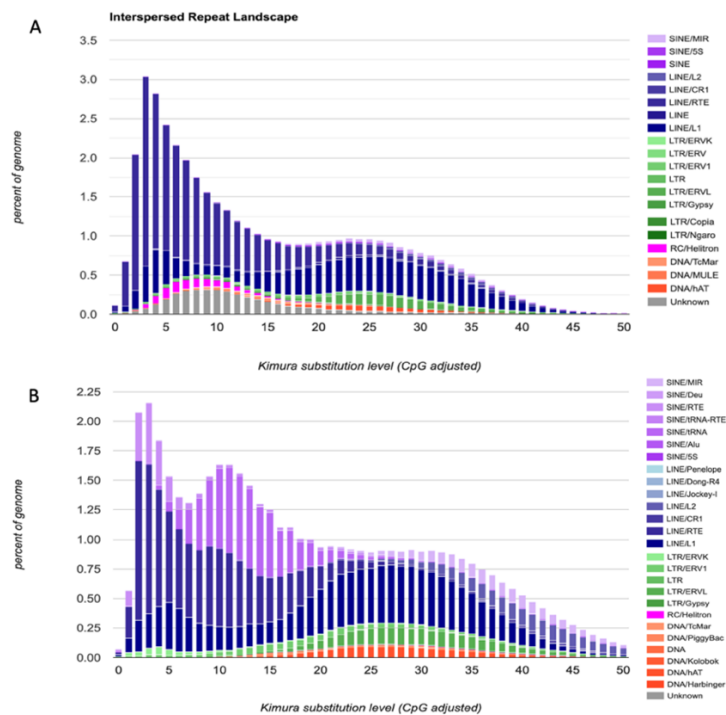

545

546

**Figure 7:** Interspersed Repeat Landscape of (A) the lowland anoa genome assembled in this study and (B) *Bos taurus*.

547
